# Supplementary material for: Involvement of Laccase2 in Cuticle Sclerotization of the Whitefly, Bemisia tabaci Middle East–Asia Minor 1
Source: MDPI journal article supplement (doi:10.3390/insects13050471), 2022-05-18
Supplement: s1 [file s1]

**Figure S1.** The protein-coding DNA sequence and amino acid sequence for *B. tabaci* MEAM1 *Lac2* gene. Note: start codon (ATG); stop codon (TGA); glycosylation sites are double-underlined; blue areas are signal peptide site; yellow areas represent copper ion domains

**Figure S1.** The protein-coding DNA sequence and amino acid sequence for *B. tabaci* MEAM1 *Lac2* gene. Note: start codon (ATG); stop codon (TGA); glycosylation sites are double-underlined; blue areas are signal peptide site; yellow areas represent copper ion domains

GATCGACGACATCCCACCAGAGATGTTCTGCAACGGAGACAACAGGCCAGCAGACTGTGGAAGGA  
ACTGTATGTGCACACACAAGGTGGACATTCTCTTCACGCTATTGTAGAGGTCGTTCTCGTCGACGA  
GGTACAACAACCAAACCTTGAGTCATCCGTTCCATTTGCACGGTTACACATTCAATGTCATCGGTATG  
GGTCGATCACCAGACAAGAACGTTAAGAAAATCAACTTGAAACACGCATTAGATCTTGACAGGCG  
AGGACTGTTGGACAGACACTTCAACCTTCCTCCCGGCAAGGACACAATTGCAGTACCAAACAACGG  
ATACGTTGTCTTTAGGTTTAGGGCAGACAATCCAGGTTACTGGTTGTTCCACTGTCATTCTTGTTCC  
ACATTCTCATCGGTATGAACTTAGTCCTTCACGTAGGTACTCACGCCGACCTACCACCAGTGCCAGA  
AGGTTTCCCTCGAT

**Figure S2.** The sequence of the gene region used for dsRNA syhthesis.
